# Supplementary material for: Synthesis, Structure, DNA Interaction, and SOD Activity of Three Nickel(II) Complexes Containing L-Phenylalanine Schiff Base and 1,10-Phenanthroline
Source: PubMed Central journal article supplement (PMC6057355; doi:10.1155/2018/8478152), 2018-07-05

## Supplementary Materials:

### 1. Mass spectra of the Schiff bases 1, 2 and 3

The mass spectra showed ion peak at  $m/z = 270.11$  as the molecular ion peak ( $[M+H]^+$ ) of Schiff base **1** (Fig. S1). The ion peak at  $m/z = 320.13$  is due to the molecular ion peak ( $[M+H]^+$ ) of Schiff base **2** (Fig. S2). The ion peak at  $m/z = 300.12$  corresponds to the molecular ion peak ( $[M+H]^+$ ) of Schiff base **3** (Fig. S3). The above results are consistent with the theoretical molecular weight of Schiff base **1** ( $C_{16}H_{15}NO_3$ : Mr = 269.30), Schiff base **2** ( $C_{20}H_{17}NO_3$ : Mr = 319.36) and Schiff base **3** ( $C_{17}H_{17}NO_4$ : Mr = 299.32), respectively.

#### Schiff base 1

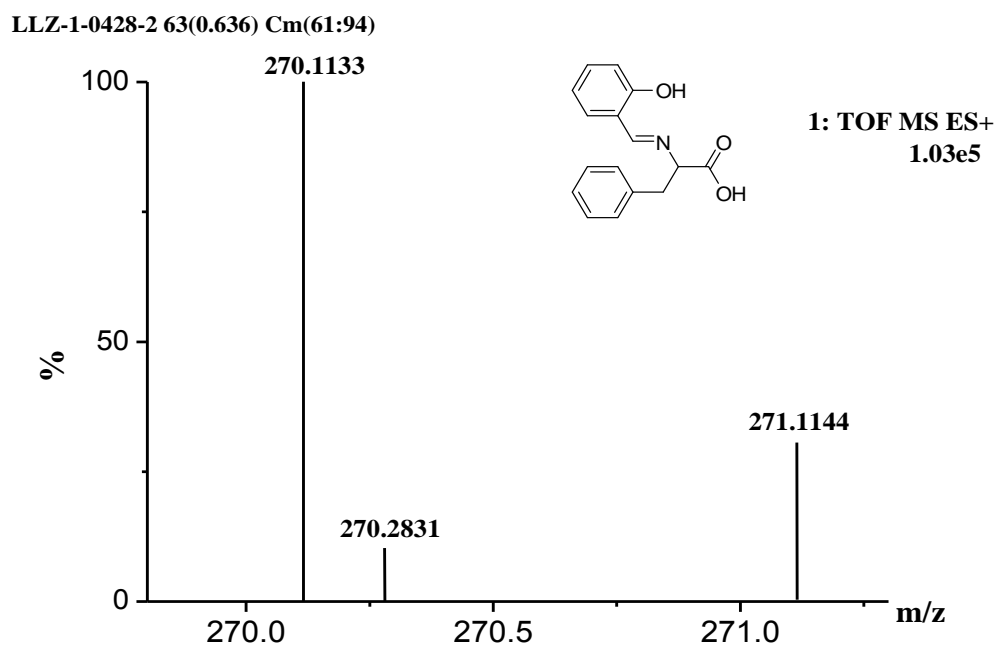

Fig. S1. Mass spectrum of the Schiff base 1

### Schiff base 2

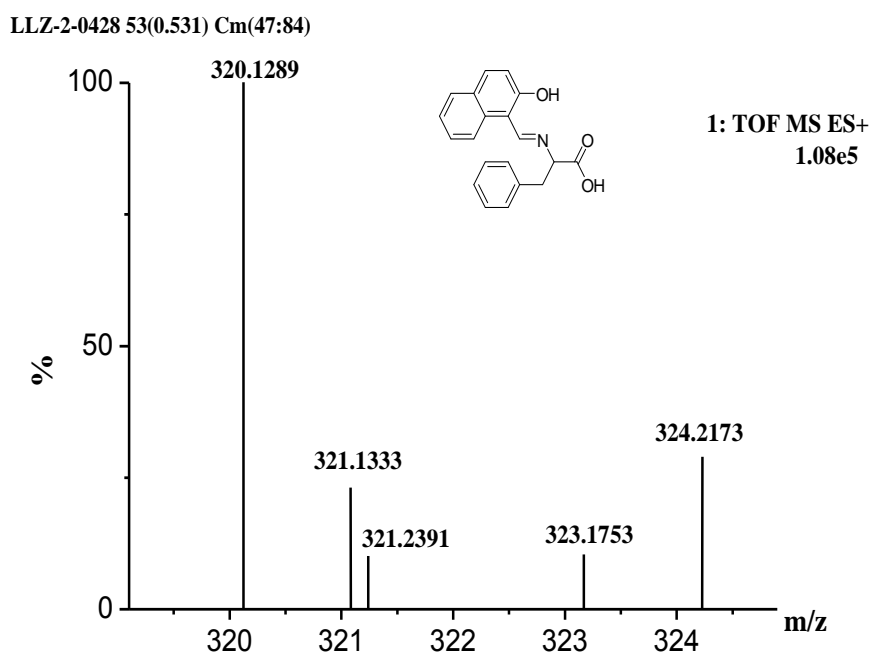

**Fig. S2.** Mass spectrum of the Schiff base 2

### Schiff base 3

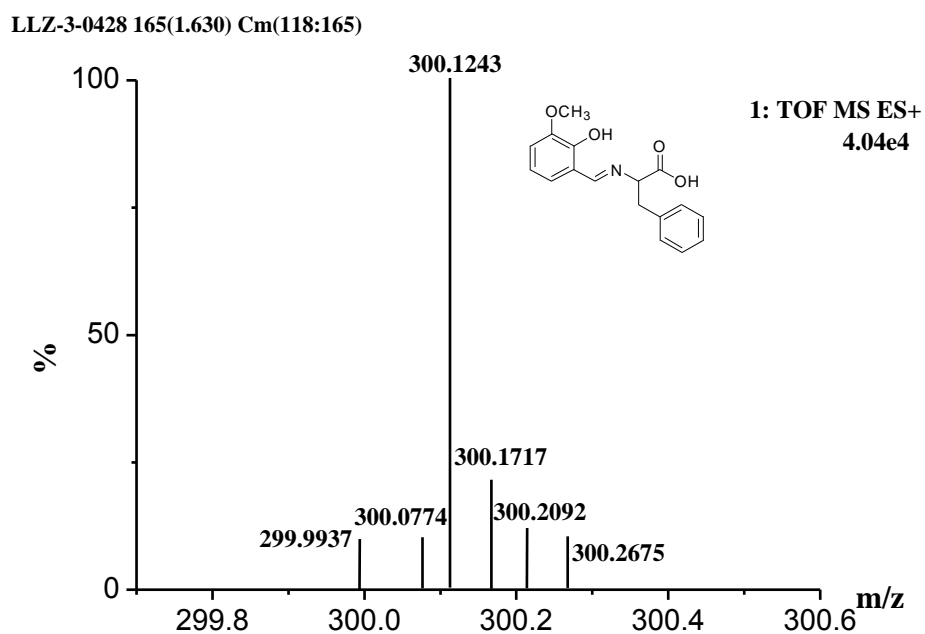

**Fig. S3.** Mass spectrum of the Schiff base 3

## 2. <sup>1</sup>H NMR spectra of the Schiff bases 1, 2 and 3

The <sup>1</sup>H NMR spectra of the Schiff bases **1**, **2** and **3** in dimethyl sulfoxide (DMSO-*d*<sub>6</sub>) were recorded on Varian 400 MHz spectrometer. <sup>1</sup>H NMR spectra of Schiff bases **1** (Fig. S4), **2** (Fig. S5) and **3** (Fig. S6) were assigned as follows.

Schiff base **1**:

δ: 14.30 (s, 1H, COOH), 8.09 (s, 1H, CH=N), 7.20 (t, *J*=7.6, 4H, ArH), 7.15 (d, *J*=6.8, 2H, ArH), 7.10 (t, *J*=7.0, 1H, ArH), 6.71 (d, *J*=8.1, 1H, ArH), 6.66 (t, *J*=7.4, 1H, ArH), 3.82 (dd, *J*=9.5, 3.9, 1H, CH), 3.28 (dd, *J*=13.8, 3.9, 1H, CH<sub>2</sub>), 2.92 (dd, *J*=13.8, 9.5, 1H, CH<sub>2</sub>).

Schiff base **2**:

δ: 13.46 (s, 1H, COOH), 8.36 (d, *J*=12.5, 1H, CH=N), 7.62 – 7.55 (m, 2H, ArH), 7.51 (d, *J*=7.4, 1H, ArH), 7.23 (d, *J*=17.7, 5H, ArH), 7.12 (s, 1H, ArH), 7.05 (t, *J*=7.3, 1H, ArH), 6.57 (d, *J*=9.4, 1H, ArH), 4.12 (s, 1H, CH), 2.96 – 2.83 (m, 1H, CH<sub>2</sub>).

Schiff base **3**:

δ: 14.23 (s, 1H, COOH), 7.95 (s, 1H, CH=N), 7.23 – 7.17 (m, 2H, ArH), 7.17 – 7.09 (m, 3H, ArH), 6.78 (d, *J*=6.4, 1H, ArH), 6.69 (dd, *J*=8.0, 1.4, 1H, ArH), 6.41 (t, *J*=7.8, 1H, ArH), 3.87 (d, *J*=9.1, 1H, CH), 3.70 (s, 3H, OCH<sub>3</sub>), 3.28 (dd, *J*=14.0, 3.8, 1H, CH<sub>2</sub>), 2.91 (dd, *J*=13.9, 9.7, 1H, CH<sub>2</sub>).

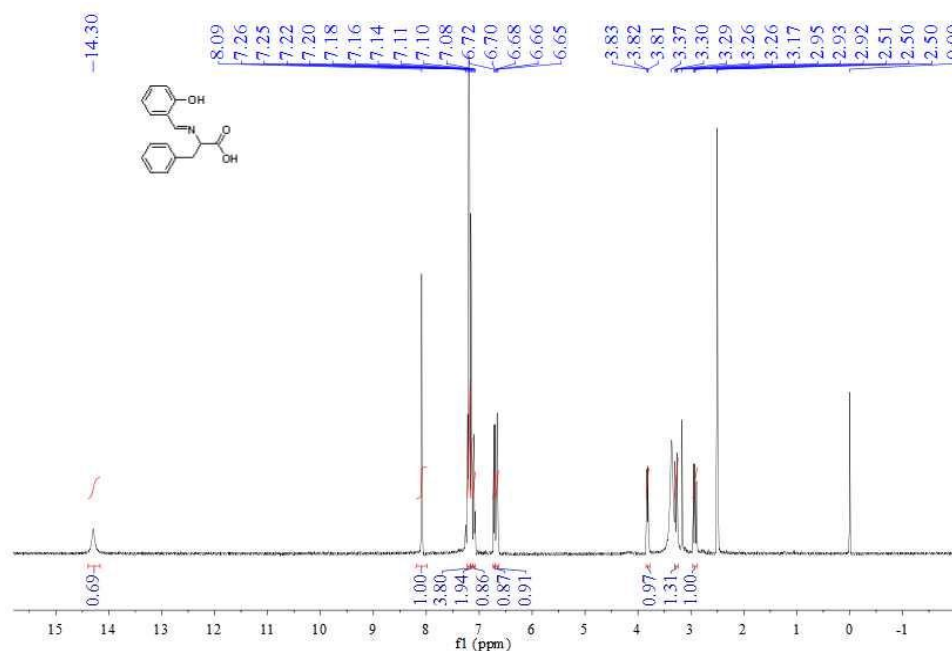

Fig. S4. <sup>1</sup>H NMR spectrum of the Schiff base **1**

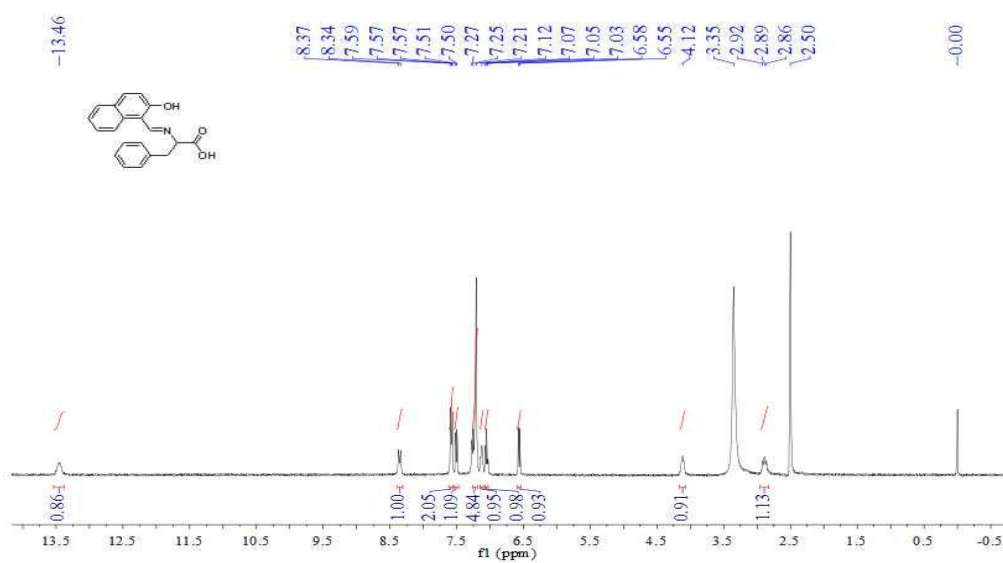

**Fig. S5.**  $^1\text{H}$  NMR spectrum of the Schiff base 2

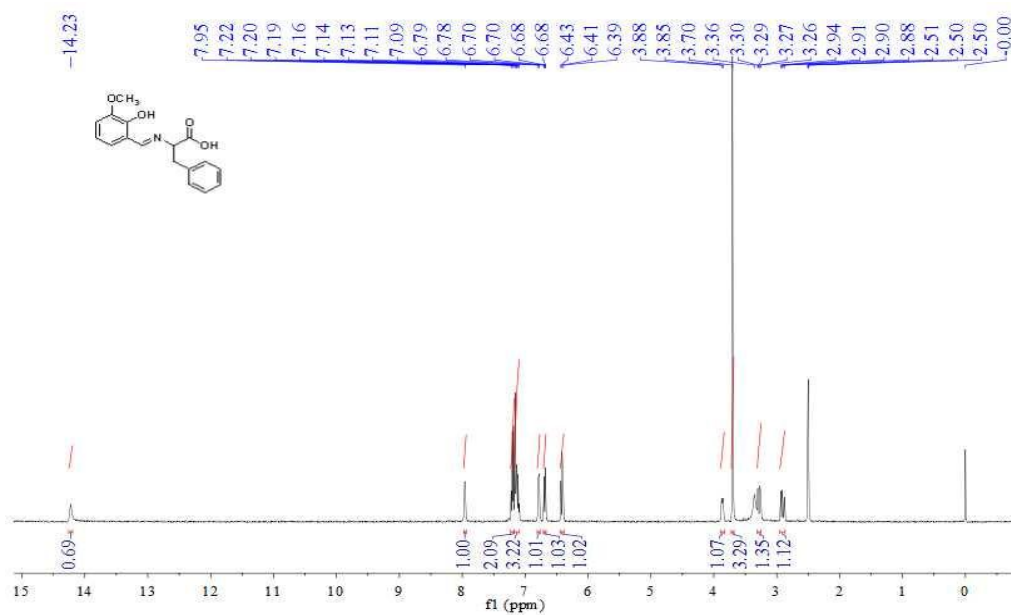

**Fig. S6.**  $^1\text{H}$  NMR spectrum of the Schiff base 3

### 3. CheckCIF/PLATON reports for the crystal structure determinations of the Complexes 1, 2 and 3

#### 3.1 Complex 1

##### checkCIF/PLATON report

You have not supplied any structure factors. As a result the full set of tests cannot be run.

THIS REPORT IS FOR GUIDANCE ONLY. IF USED AS PART OF A REVIEW PROCEDURE FOR PUBLICATION, IT SHOULD NOT REPLACE THE EXPERTISE OF AN EXPERIENCED CRYSTALLOGRAPHIC REFEREE.

No syntax errors found.    CIF dictionary    Interpreting this report

##### Datablock: 131107e

---

Bond precision:    C-C = 0.0062 A                      Wavelength=0.71073

Cell:                      a=26.741(3)            b=18.1651(17)            c=11.8350(9)  
                                    alpha=90                      beta=108.528(2)            gamma=90

Temperature:            298 K

|                | Calculated               | Reported         |
|----------------|--------------------------|------------------|
| Volume         | 5450.9(9)                | 5450.9(8)        |
| Space group    | C 2/c                    | C2/c             |
| Hall group     | -C 2yc                   | ?                |
| Moiety formula | C29 H25 N3 Ni O4, C H4 O | ?                |
| Sum formula    | C30 H29 N3 Ni O5         | C30 H29 N3 Ni O5 |
| Mr             | 570.25                   | 570.27           |
| Dx,g cm-3      | 1.390                    | 1.390            |
| Z              | 8                        | 8                |
| Mu (mm-1)      | 0.756                    | 0.756            |
| F000           | 2384.0                   | 2384.0           |
| F000'          | 2387.64                  |                  |
| h,k,lmax       | 31,21,14                 | 31,21,14         |
| Nref           | 4824                     | 4816             |
| Tmin,Tmax      | 0.730,0.768              | 0.737,0.778      |
| Tmin'          | 0.715                    |                  |

Correction method= # Reported T Limits: Tmin=0.737 Tmax=0.778  
AbsCorr = MULTI-SCAN

Data completeness= 0.998                      Theta(max)= 25.020

R(reflections)= 0.0432( 3035)                      wR2(reflections)= 0.1248( 4816)

S = 1.094                                              Npar= 366

---

The following ALERTS were generated. Each ALERT has the format  
test-name\_ALERT\_alert-type\_alert-level.  
Click on the hyperlinks for more details of the test.

---

**Alert level C**

PLAT331\_ALERT\_2\_C Small Average Phenyl C-C Dist C4 -C9 1.37 Ang.  
PLAT341\_ALERT\_3\_C Low Bond Precision on C-C Bonds ..... 0.00625 Ang.  
PLAT480\_ALERT\_4\_C Long H...A H-Bond Reported H29A ..03 2.63 Ang.

---

**Alert level G**

PLAT002\_ALERT\_2\_G Number of Distance or Angle Restraints on AtSite 4 Note  
PLAT005\_ALERT\_5\_G No Embedded Refinement Details Found in the CIF Please Do !  
PLAT007\_ALERT\_5\_G Number of Unrefined Donor-H Atoms ..... 3 Report  
PLAT083\_ALERT\_2\_G SHELXL Second Parameter in WGHT Unusually Large 5.89 Why ?  
PLAT093\_ALERT\_1\_G No s.u.'s on H-positions, Refinement Reported as mixed Check  
PLAT128\_ALERT\_4\_G Alternate Setting for Input Space Group C2/c I2/a Note  
PLAT302\_ALERT\_4\_G Anion/Solvent/Minor-Residue Disorder (Resd 2 ) 100% Note  
PLAT302\_ALERT\_4\_G Anion/Solvent/Minor-Residue Disorder (Resd 3 ) 100% Note  
PLAT304\_ALERT\_4\_G Non-Integer Number of Atoms in ..... Resd 2 3.17 Check  
PLAT304\_ALERT\_4\_G Non-Integer Number of Atoms in ..... Resd 3 2.83 Check  
PLAT720\_ALERT\_4\_G Number of Unusual/Non-Standard Labels ..... 1 Note  
PLAT793\_ALERT\_4\_G Model has Chirality at C2 (Centro SPGR) R Verify  
PLAT860\_ALERT\_3\_G Number of Least-Squares Restraints ..... 3 Note  
PLAT899\_ALERT\_4\_G SHELXL97 is Deprecated and Succeeded by SHELXL 2018 Note

---

0 ALERT level A = Most likely a serious problem - resolve or explain  
0 ALERT level B = A potentially serious problem, consider carefully  
3 ALERT level C = Check. Ensure it is not caused by an omission or oversight  
14 ALERT level G = General information/check it is not something unexpected

1 ALERT type 1 CIF construction/syntax error, inconsistent or missing data  
3 ALERT type 2 Indicator that the structure model may be wrong or deficient  
2 ALERT type 3 Indicator that the structure quality may be low  
9 ALERT type 4 Improvement, methodology, query or suggestion  
2 ALERT type 5 Informative message, check

---

It is advisable to attempt to resolve as many as possible of the alerts in all categories. Often the minor alerts point to easily fixed oversights, errors and omissions in your CIF or refinement strategy, so attention to these fine details can be worthwhile. In order to resolve some of the more serious problems it may be necessary to carry out additional measurements or structure refinements. However, the purpose of your study may justify the reported deviations and the more serious of these should normally be commented upon in the discussion or experimental section of a paper or in the "special\_details" fields of the CIF. checkCIF was carefully designed to identify outliers and unusual parameters, but every test has its limitations and alerts that are not important in a particular case may appear. Conversely, the absence of alerts does not guarantee there are no aspects of the results needing attention. It is up to the individual to critically assess their own results and, if necessary, seek expert advice.

#### **Publication of your CIF in IUCr journals**

A basic structural check has been run on your CIF. These basic checks will be run on all CIFs submitted for publication in IUCr journals (*Acta Crystallographica*, *Journal of Applied Crystallography*, *Journal of Synchrotron Radiation*); however, if you intend to submit to *Acta Crystallographica Section C* or *E* or *IUCrData*, you should make sure that full publication checks are run on the final version of your CIF prior to submission.

#### **Publication of your CIF in other journals**

Please refer to the *Notes for Authors* of the relevant journal for any special instructions relating to CIF submission.

---

**PLATON version of 30/01/2018; check.def file version of 30/01/2018**

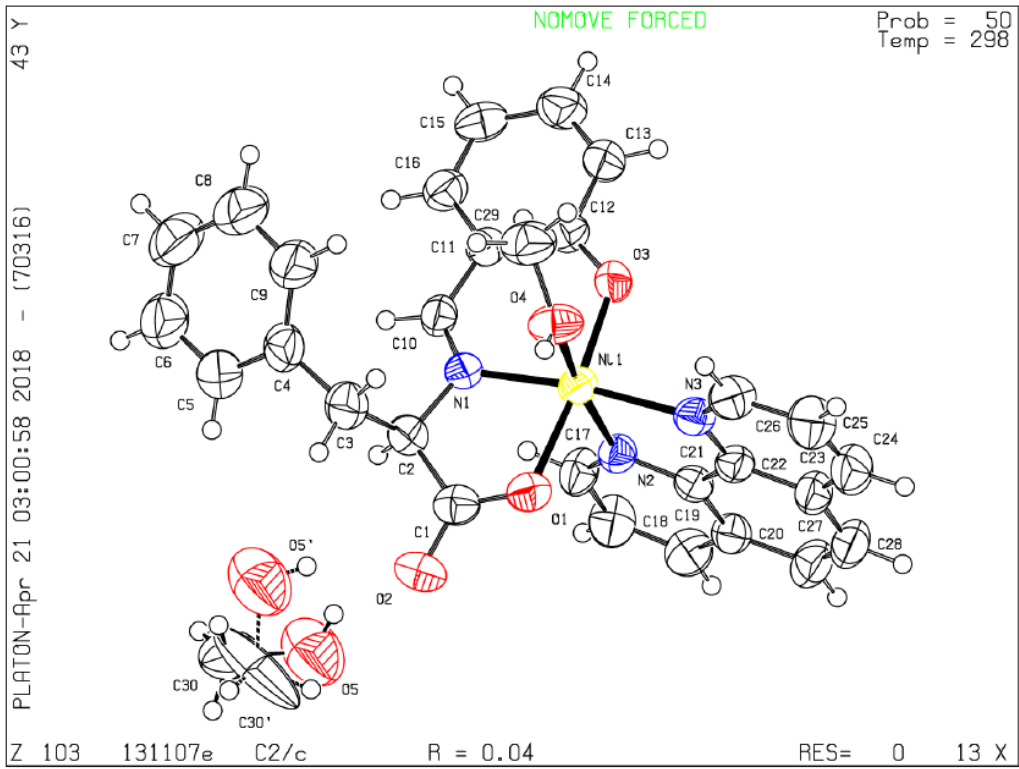



## 3.2 Complex 2

### checkCIF/PLATON report

You have not supplied any structure factors. As a result the full set of tests cannot be run.

THIS REPORT IS FOR GUIDANCE ONLY. IF USED AS PART OF A REVIEW PROCEDURE FOR PUBLICATION, IT SHOULD NOT REPLACE THE EXPERTISE OF AN EXPERIENCED CRYSTALLOGRAPHIC REFEREE.

No syntax errors found.    CIF dictionary    Interpreting this report

### Datablock: 151211e

---

Bond precision:    C-C = 0.0065 A                      Wavelength=0.71073

Cell:                      a=10.8240(8)                      b=11.9041(9)                      c=13.0879(11)  
                                    alpha=67.226(1)                      beta=73.566(2)                      gamma=64.094(1)  
Temperature:    298 K

|                | Calculated       | Reported         |
|----------------|------------------|------------------|
| Volume         | 1385.43(19)      | 1385.43(19)      |
| Space group    | P -1             | P -1             |
| Hall group     | -P 1             | -P 1             |
| Moiety formula | C33 H27 N3 Ni O4 | ?                |
| Sum formula    | C33 H27 N3 Ni O4 | C33 H27 N3 Ni O4 |
| Mr             | 588.27           | 588.28           |
| Dx, g cm-3     | 1.410            | 1.410            |
| Z              | 2                | 2                |
| Mu (mm-1)      | 0.744            | 0.744            |
| F000           | 612.0            | 612.0            |
| F000'          | 612.90           |                  |
| h, k, lmax     | 12, 14, 15       | 12, 14, 15       |
| Nref           | 4893             | 4791             |
| Tmin, Tmax     | 0.843, 0.915     |                  |
| Tmin'          | 0.843            |                  |

Correction method= Not given

Data completeness= 0.979                      Theta(max)= 25.015

R(reflections)= 0.0566( 3363)                      wR2(reflections)= 0.1456( 4791)

S = 0.952                                      Npar= 363

---

The following ALERTS were generated. Each ALERT has the format  
**test-name\_ALERT\_alert-type\_alert-level**.  
Click on the hyperlinks for more details of the test.

---

● **Alert level C**

```
PLAT018_ALERT_1_C_diffn_measured_fraction_theta_max .NE. *_full ! Check
PLAT094_ALERT_2_C Ratio of Maximum / Minimum Residual Density ... 2.20 Report
PLAT220_ALERT_2_C Non-Solvent Resd 1 C Ueq(max)/Ueq(min) Range 3.8 Ratio
PLAT234_ALERT_4_C Large Hirshfeld Difference C7 --C8 0.16 Ang.
PLAT241_ALERT_2_C High 'MainMol' Ueq as Compared to Neighbors of C7 Check
PLAT341_ALERT_3_C Low Bond Precision on C-C Bonds ..... 0.00645 Ang.
PLAT410_ALERT_2_C Short Intra H...H Contact H10 ..H17 1.98 Ang.
```

● **Alert level G**

```
PLAT793_ALERT_4_G Model has Chirality at C2 (Centro SPGR) S Verify
```

---

0 **ALERT level A** = Most likely a serious problem - resolve or explain  
0 **ALERT level B** = A potentially serious problem, consider carefully  
7 **ALERT level C** = Check. Ensure it is not caused by an omission or oversight  
1 **ALERT level G** = General information/check it is not something unexpected

1 ALERT type 1 CIF construction/syntax error, inconsistent or missing data  
4 ALERT type 2 Indicator that the structure model may be wrong or deficient  
1 ALERT type 3 Indicator that the structure quality may be low  
2 ALERT type 4 Improvement, methodology, query or suggestion  
0 ALERT type 5 Informative message, check

---

It is advisable to attempt to resolve as many as possible of the alerts in all categories. Often the minor alerts point to easily fixed oversights, errors and omissions in your CIF or refinement strategy, so attention to these fine details can be worthwhile. In order to resolve some of the more serious problems it may be necessary to carry out additional measurements or structure refinements. However, the purpose of your study may justify the reported deviations and the more serious of these should normally be commented upon in the discussion or experimental section of a paper or in the "special\_details" fields of the CIF. checkCIF was carefully designed to identify outliers and unusual parameters, but every test has its limitations and alerts that are not important in a particular case may appear. Conversely, the absence of alerts does not guarantee there are no aspects of the results needing attention. It is up to the individual to critically assess their own results and, if necessary, seek expert advice.

#### **Publication of your CIF in IUCr journals**

A basic structural check has been run on your CIF. These basic checks will be run on all CIFs submitted for publication in IUCr journals (*Acta Crystallographica*, *Journal of Applied Crystallography*, *Journal of Synchrotron Radiation*); however, if you intend to submit to *Acta Crystallographica Section C* or *E* or *IUCrData*, you should make sure that full publication checks are run on the final version of your CIF prior to submission.

#### **Publication of your CIF in other journals**

Please refer to the *Notes for Authors* of the relevant journal for any special instructions relating to CIF submission.

---

**PLATON version of 30/01/2018; check.def file version of 30/01/2018**

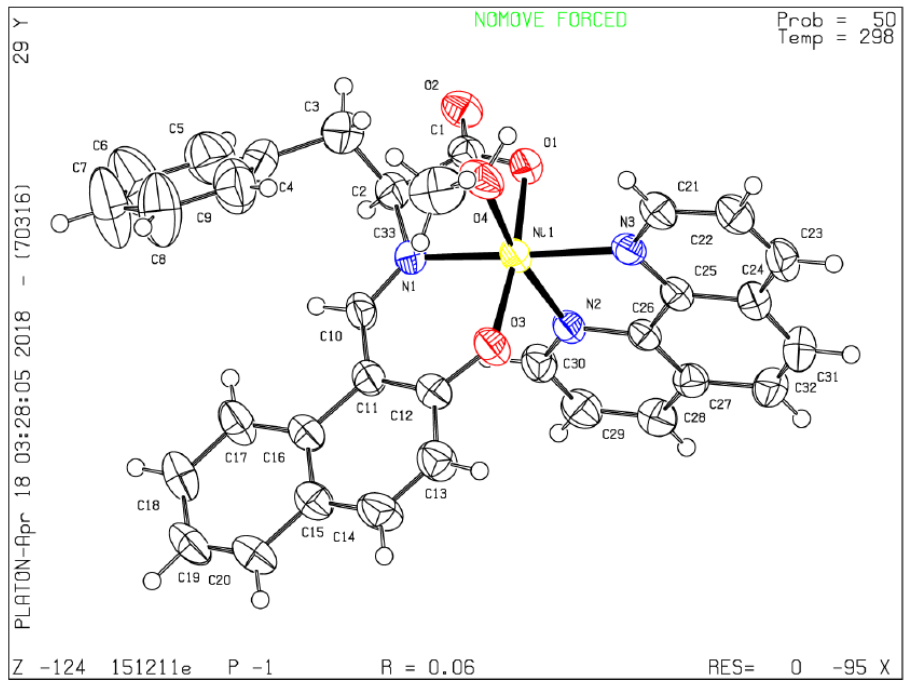

### 3.3 Complex 3

#### checkCIF/PLATON report

You have not supplied any structure factors. As a result the full set of tests cannot be run.

THIS REPORT IS FOR GUIDANCE ONLY. IF USED AS PART OF A REVIEW PROCEDURE FOR PUBLICATION, IT SHOULD NOT REPLACE THE EXPERTISE OF AN EXPERIENCED CRYSTALLOGRAPHIC REFEREE.

No syntax errors found.      CIF dictionary      Interpreting this report

#### Datablock: 130323h

---

Bond precision:    C-C = 0.0136 A                      Wavelength=0.71073

Cell:                      a=12.7068 (10)              b=13.5015 (14)              c=29.9214 (17)  
                                    alpha=83.667 (2)              beta=82.747 (1)              gamma=63.979 (1)  
Temperature:    293 K

|                | Calculated                          | Reported            |
|----------------|-------------------------------------|---------------------|
| Volume         | 4567.4 (6)                          | 4567.4 (6)          |
| Space group    | P -1                                | P-1                 |
| Hall group     | -P 1                                | ?                   |
| Moiety formula | 3 (C30 H27 N3 Ni O5), 5 (C<br>H4 O) | ?                   |
| Sum formula    | C95 H101 N9 Ni3 O20                 | C95 H101 N9 Ni3 O20 |
| Mr             | 1864.92                             | 1864.98             |
| Dx, g cm-3     | 1.356                               | 1.356               |
| Z              | 2                                   | 2                   |
| Mu (mm-1)      | 0.687                               | 0.687               |
| F000           | 1956.0                              | 1956.0              |
| F000'          | 1958.85                             |                     |
| h,k,lmax       | 15,16,35                            | 15,16,35            |
| Nref           | 16133                               | 16112               |
| Tmin,Tmax      | 0.842,0.884                         | 0.847,0.886         |
| Tmin'          | 0.842                               |                     |

Correction method= # Reported T Limits: Tmin=0.847 Tmax=0.886  
AbsCorr = MULTI-SCAN

Data completeness= 0.999                      Theta(max)= 25.020

R(reflections)= 0.0870 ( 6748)              wR2(reflections)= 0.2584 ( 16112)

S = 1.004                                      Npar= 1155

---

The following ALERTS were generated. Each ALERT has the format  
test-name ALERT\_alert-type\_alert-level.  
Click on the hyperlinks for more details of the test.

---

● Alert level C

|                   |                                                  |         |        |
|-------------------|--------------------------------------------------|---------|--------|
| PLAT026_ALERT_3_C | Ratio Observed / Unique Reflections (too) Low .. | 42%     | Check  |
| PLAT084_ALERT_3_C | High wR2 Value (i.e. > 0.25) .....               | 0.26    | Report |
| PLAT220_ALERT_2_C | Non-Solvent Resd 3 C Ueq(max)/Ueq(min) Range     | 3.5     | Ratio  |
| PLAT230_ALERT_2_C | Hirshfeld Test Diff for O15 --C90 .              | 5.3     | s.u.   |
| PLAT230_ALERT_2_C | Hirshfeld Test Diff for C64 --C69 .              | 5.9     | s.u.   |
| PLAT230_ALERT_2_C | Hirshfeld Test Diff for C81 --C82 .              | 5.3     | s.u.   |
| PLAT234_ALERT_4_C | Large Hirshfeld Difference C6 --C7               | 0.16    | Ang.   |
| PLAT234_ALERT_4_C | Large Hirshfeld Difference C38 --C39             | 0.17    | Ang.   |
| PLAT234_ALERT_4_C | Large Hirshfeld Difference C62 --C63             | 0.16    | Ang.   |
| PLAT241_ALERT_2_C | High 'MainMol' Ueq as Compared to Neighbors of   | C38     | Check  |
| PLAT241_ALERT_2_C | High 'MainMol' Ueq as Compared to Neighbors of   | C66     | Check  |
| PLAT242_ALERT_2_C | Low 'MainMol' Ueq as Compared to Neighbors of    | 09      | Check  |
| PLAT242_ALERT_2_C | Low 'MainMol' Ueq as Compared to Neighbors of    | 014     | Check  |
| PLAT242_ALERT_2_C | Low 'MainMol' Ueq as Compared to Neighbors of    | 015     | Check  |
| PLAT242_ALERT_2_C | Low 'MainMol' Ueq as Compared to Neighbors of    | C64     | Check  |
| PLAT331_ALERT_2_C | Small Average Phenyl C-C Dist C34 -C39           | 1.37    | Ang.   |
| PLAT341_ALERT_3_C | Low Bond Precision on C-C Bonds .....            | 0.01364 | Ang.   |

---

● Alert level G

|                   |                                                  |             |        |
|-------------------|--------------------------------------------------|-------------|--------|
| PLAT002_ALERT_2_G | Number of Distance or Angle Restraints on AtSite | 30          | Note   |
| PLAT003_ALERT_2_G | Number of Uiso or Uij Restrained non-H Atoms ... | 127         | Report |
| PLAT005_ALERT_5_G | No Embedded Refinement Details Found in the CIF  | Please Do ! |        |
| PLAT007_ALERT_5_G | Number of Unrefined Donor-H Atoms .....          | 8           | Report |
| PLAT066_ALERT_1_G | Predicted and Reported Tmin&Tmax Range Identical | ?           | Check  |
| PLAT199_ALERT_1_G | Reported _cell_measurement_temperature .... (K)  | 293         | Check  |
| PLAT200_ALERT_1_G | Reported _diffrn_ambient_temperature .... (K)    | 293         | Check  |
| PLAT793_ALERT_4_G | Model has Chirality at C2 (Centro SPGR)          | R           | Verify |
| PLAT793_ALERT_4_G | Model has Chirality at C32 (Centro SPGR)         | S           | Verify |
| PLAT793_ALERT_4_G | Model has Chirality at C62 (Centro SPGR)         | R           | Verify |
| PLAT860_ALERT_3_G | Number of Least-Squares Restraints .....         | 3688        | Note   |
| PLAT899_ALERT_4_G | SHELXL97 is Deprecated and Succeeded by SHELXL   | 2018        | Note   |

---

0 ALERT level A = Most likely a serious problem - resolve or explain  
0 ALERT level B = A potentially serious problem, consider carefully  
17 ALERT level C = Check. Ensure it is not caused by an omission or oversight  
12 ALERT level G = General information/check it is not something unexpected

3 ALERT type 1 CIF construction/syntax error, inconsistent or missing data  
13 ALERT type 2 Indicator that the structure model may be wrong or deficient  
4 ALERT type 3 Indicator that the structure quality may be low  
7 ALERT type 4 Improvement, methodology, query or suggestion  
2 ALERT type 5 Informative message, check

---

It is advisable to attempt to resolve as many as possible of the alerts in all categories. Often the minor alerts point to easily fixed oversights, errors and omissions in your CIF or refinement strategy, so attention to these fine details can be worthwhile. In order to resolve some of the more serious problems it may be necessary to carry out additional measurements or structure refinements. However, the purpose of your study may justify the reported deviations and the more serious of these should normally be commented upon in the discussion or experimental section of a paper or in the "special\_details" fields of the CIF. checkCIF was carefully designed to identify outliers and unusual parameters, but every test has its limitations and alerts that are not important in a particular case may appear. Conversely, the absence of alerts does not guarantee there are no aspects of the results needing attention. It is up to the individual to critically assess their own results and, if necessary, seek expert advice.

#### **Publication of your CIF in IUCr journals**

A basic structural check has been run on your CIF. These basic checks will be run on all CIFs submitted for publication in IUCr journals (*Acta Crystallographica*, *Journal of Applied Crystallography*, *Journal of Synchrotron Radiation*); however, if you intend to submit to *Acta Crystallographica Section C* or *E* or *IUCrData*, you should make sure that full publication checks are run on the final version of your CIF prior to submission.

#### **Publication of your CIF in other journals**

Please refer to the *Notes for Authors* of the relevant journal for any special instructions relating to CIF submission.

---

**PLATON version of 30/01/2018; check.def file version of 30/01/2018**

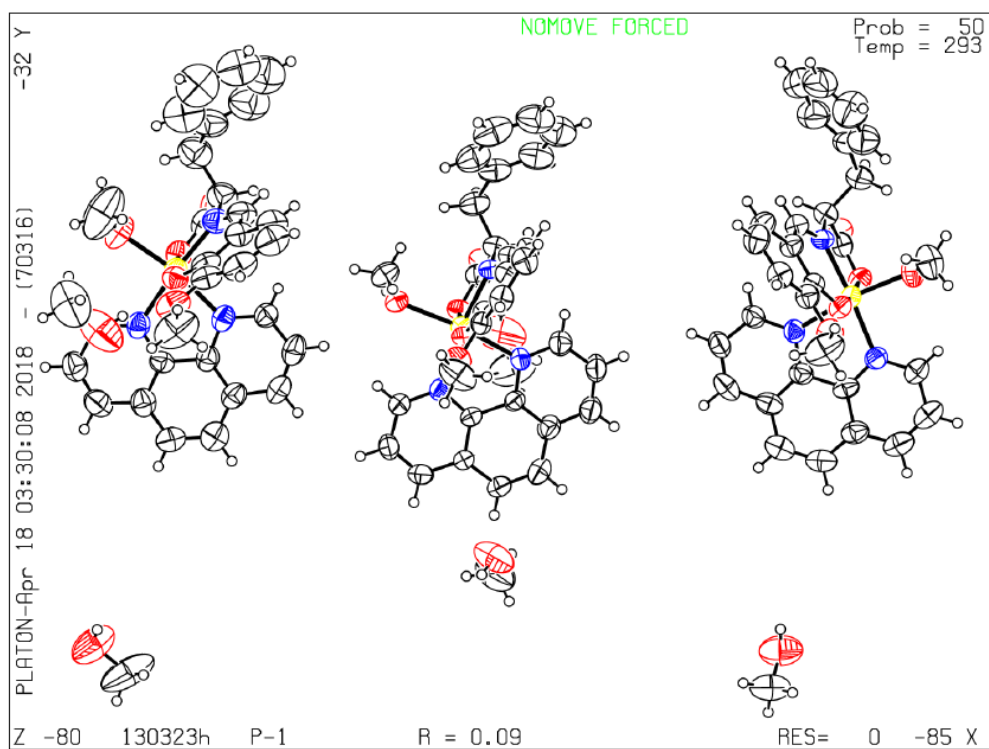

Supplement: 8478152.f1.pdf [file 8478152.f1.pdf]
